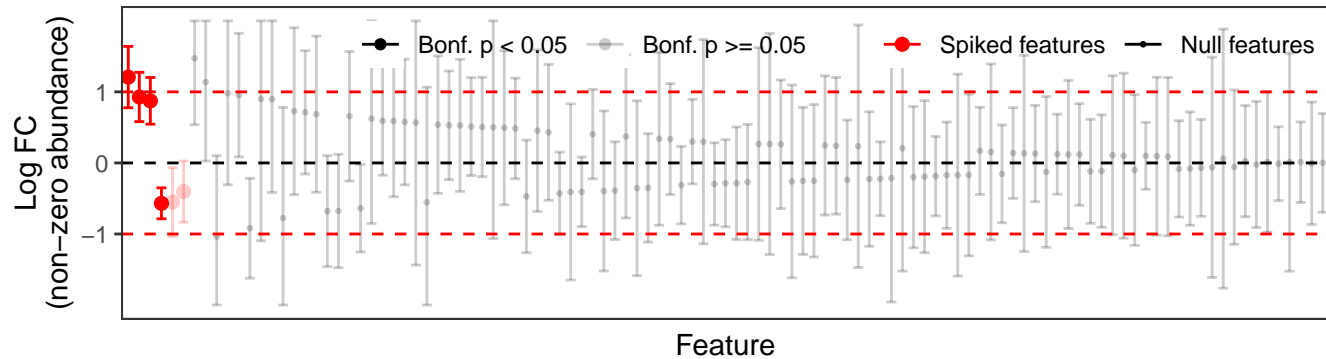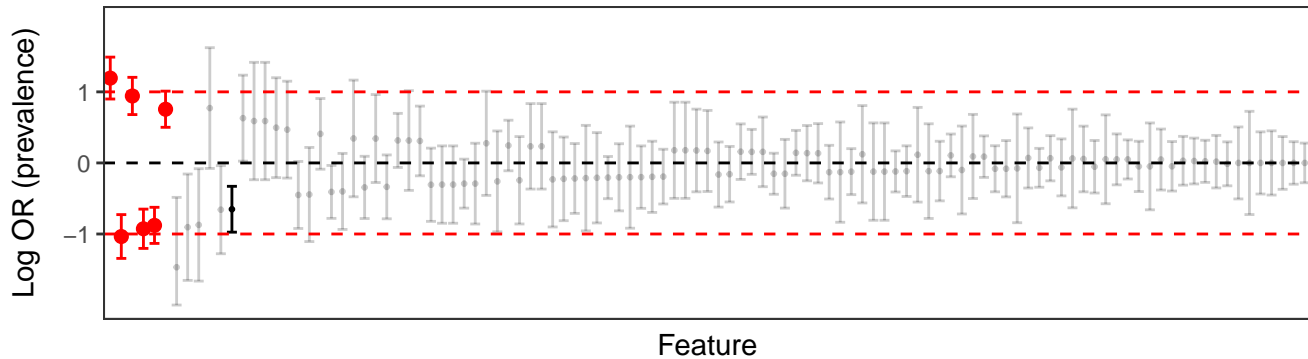

Source: https://storage.googleapis.com/plos-corpus-prod/10.1371/journal.pcbi.1008913/2/pcbi.1008913.s003.pdf
