Relative abundance Spearman (top left) vs.  
Absolute abundance Spearman (bottom right)

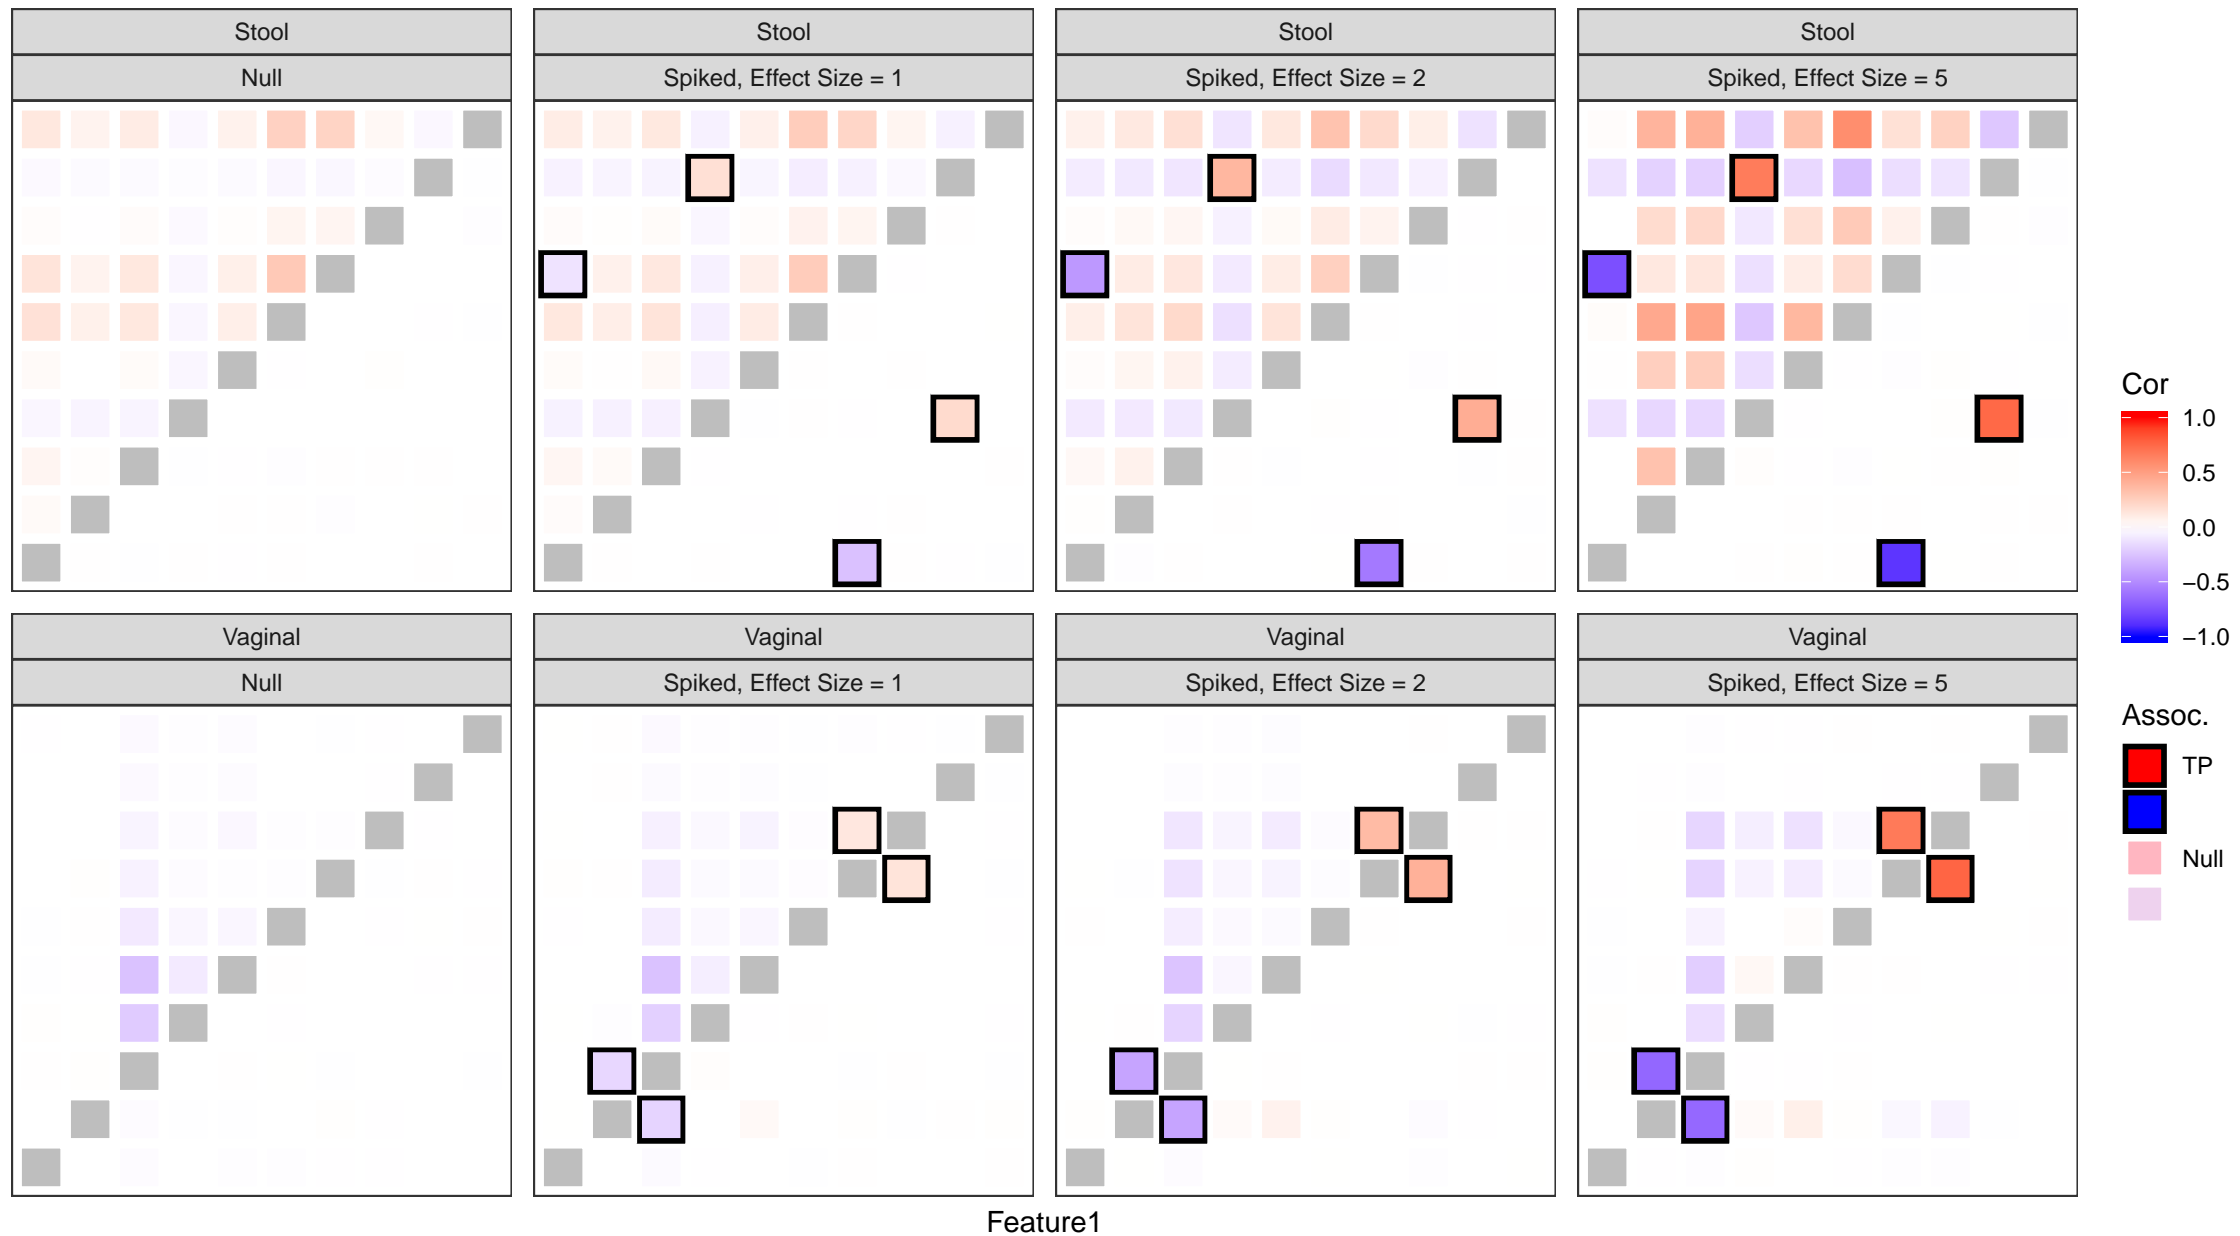

Source: https://storage.googleapis.com/plos-corpus-prod/10.1371/journal.pcbi.1008913/2/pcbi.1008913.s004.pdf
